# Supplementary material
Source: PubMed Central journal article supplement (PMC3095500)
Supplement: supp_110.009043_ajcn009043-file001.pdf [file supp_110.009043_ajcn009043-file001.pdf]

Online Supplemental Material

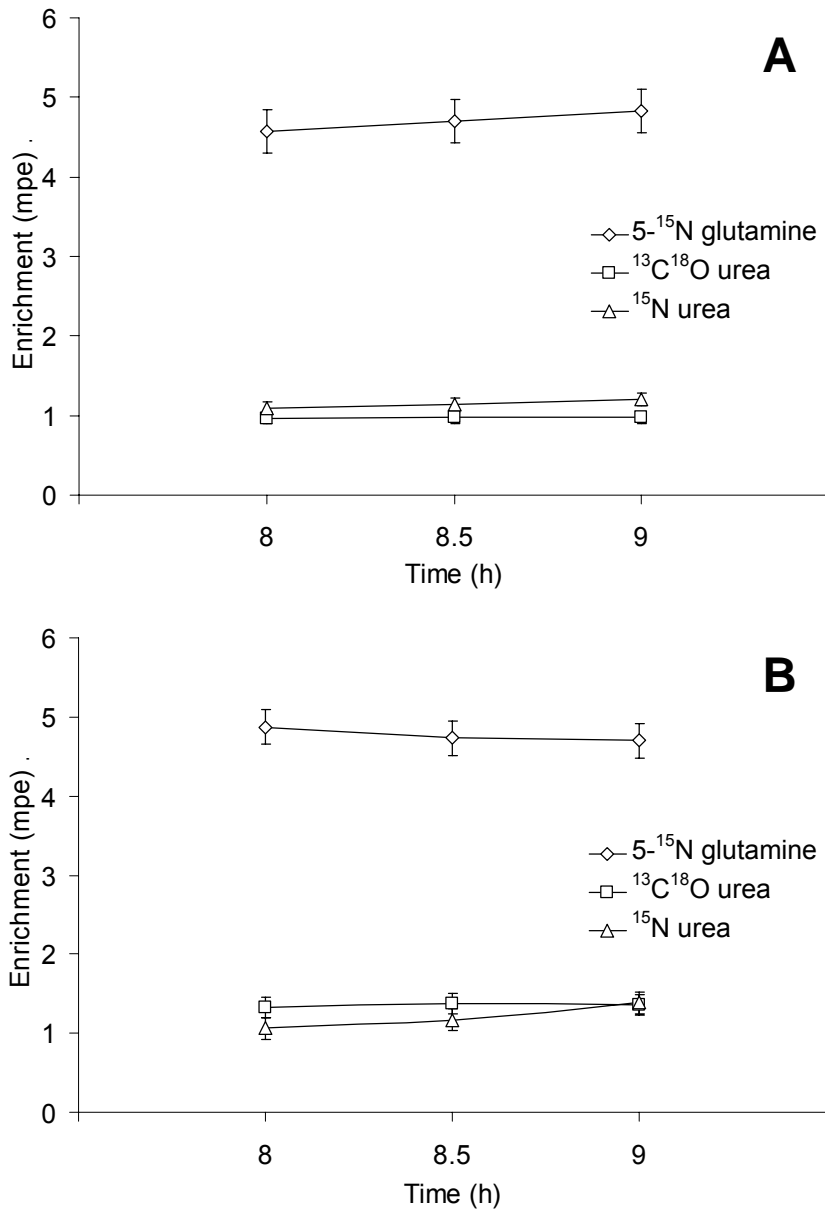

Supplemental Figure 1. Isotopic plateau enrichments of 5-<sup>15</sup>N glutamine, <sup>13</sup>C<sup>18</sup>O urea and <sup>15</sup>N urea in control (panel A) and partial OTCD (panel B) subjects. Each symbol represents the treatment and subject adjusted mean (control n=14; pOTCD n=21) and errors bars are SEM.
