# Supplementary material
Source: PubMed Central journal article supplement (PMC3095500)
Supplement: supp_110.009043_ajcn009043-file002.pdf [file supp_110.009043_ajcn009043-file002.pdf]

Online Supplemental Material

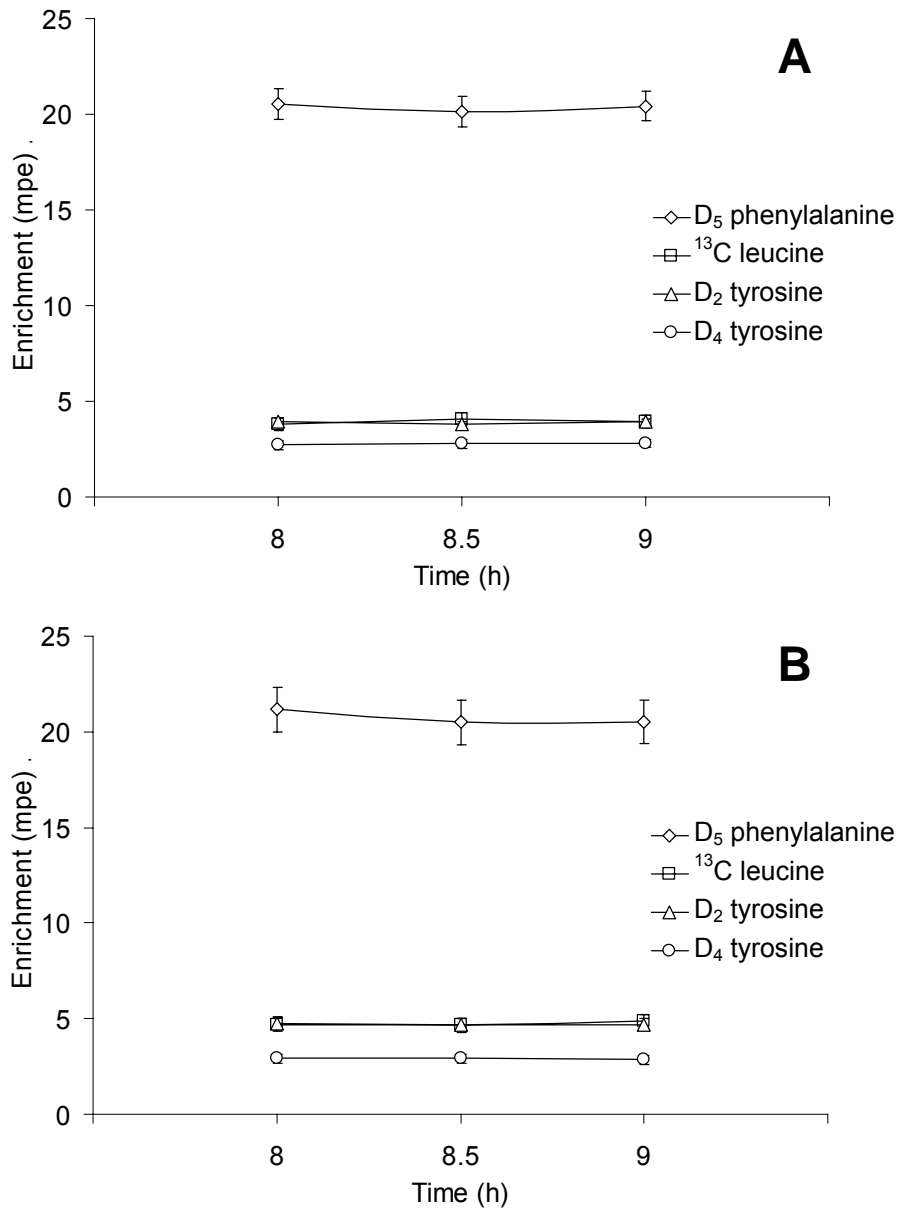

Supplemental Figure 2. Isotopic plateau enrichments of D<sub>5</sub> phenylalanine, <sup>13</sup>C leucine, D<sub>2</sub> tyrosine and D<sub>4</sub> tyrosine in control (panel A) and partial OTCD (panel B) subjects. Each symbol represents the treatment and subject adjusted mean (control n=14; pOTCD n=21) and errors bars are SEM.
